# Supplementary material for: The Royal College of Ophthalmologists National Ophthalmology Database Age-related Macular Degeneration Audit: Report 1, Associations with socio-economic deprivation in neovascular age-related macular degeneration
Source: Research Square preprint supplement (doi:10.21203/rs.3.rs-7417262/v1), 2025-09-23
Supplement: Supplementary file 4 [file 4dd87d9aad7cbb2abcce909d.xlsx]

## Sheet: Sheet1
Variables	Decile of social deprivation
	1	2	3	4	5	6	7	8	9	10
Number of eyes at one year (N)	2 566	2 676	2 945	3 401	3 933	4 186	4 458	4 811	4 898	5 565
VA at one year (column %)
≤ 25 letters	9.5	10.2	9.2	8.2	8.9	8.6	8.3	7.8	7.9	7
26 – 35 letters	8	7.2	7.1	7.8	7.1	6.3	6.9	6.8	6.8	6.1
36 – 55 letters	22.2	20.8	20.4	20.3	21.2	20	18.6	19.4	18.5	19.5
56 – 69 letters	24.4	23.9	24.2	24	22.6	23.8	22.8	23.5	22.7	21.9
≥70 letters (Good vision)	35.9	37.9	39.1	39.7	40.2	41.3	43.4	42.5	44.1	45.5
Number of eyes at one year with baseline VA > 25 ETDRS letters.	2 348	2 458	2 730	3 177	3 675	3 915	4 134	4 511	4 589	5 255
Poor vision (column %)	18.3	17.2	16	16.3	16.8	15.9	15.4	15.5	16	14.5
