# Supplementary material for: The Royal College of Ophthalmologists National Ophthalmology Database Age-related Macular Degeneration Audit: Report 1, Associations with socio-economic deprivation in neovascular age-related macular degeneration
Source: Research Square preprint supplement (doi:10.21203/rs.3.rs-7417262/v1), 2025-09-23
Supplement: Supplementary file 5 [file 7c3706625236bf3464398006.xlsx]

## Sheet: Sheet1
variables	Decile of social deprivation
	1	2	3	4	5	6	7	8	9	10
N	3 222	3 432	3 690	4 291	4 830	5 098	5 506	5 836	5 956	6 722
Age at 1st injection
(years)
Median	79	80	80	81	81	81	82	82	82	82
IQR	(73-85)	(74-86)	(74-85)	(75-86)	(75-87)	(76-86)	(76-87)	(76-87)	(77-87)	(77-87)
VA at baseline
(Column %)
≤ 25 letters	10	10.9	9	8.5	7.9	8.3	8.6	7.7	7.8	6.9
26 – 35 letters	9.8	10.7	9.5	8.9	9.2	8.9	8.4	7.9	8.2	7.5
36 – 55 letters	30.1	28.7	29.2	30.4	30.7	28.9	29.2	28	28.1	27.8
56 – 69 letters	25.9	25.6	26.5	26.1	26.5	28.4	26.8	28.6	27.9	28.8
≥ 70 letters	24.2	24.1	25.8	26.1	25.7	25.7	26.9	27.9	28	29.1
Completing the loading phase (Column %)
< 3 injections	6	6.7	6.3	5.7	5.9	5.1	5.3	5.4	5.9	4.8
within 10 weeks	71.3	69.8	69.5	70.9	70.6	72.7	71.6	72.4	73.5	72.4
10 – 12 weeks	9.2	9.9	9.8	9.7	10.1	10.4	9.9	9.1	8.7	9
12 – 16 weeks	7.1	7.1	7.1	6.3	6.2	5.6	6.2	6.4	5.7	6.2
4 – 6 months	4.5	4.2	4.5	4.9	4.4	3.9	4.3	4.3	4	4.8
> 6 months	1.9	2.3	2.8	2.5	2.8	2.3	2.7	2.4	2.2	2.8
Injections over one year (N = 345 062)	22 535	23 447	25 203	29 446	33 725	36 318	39 473	42 271	42 838	49 806
Median (IQR) injection per eye	7 (5-9)	7 (5-9)	7 (5-9)	7 (5-9)	7 (5-9)	7 (5-9)	7 (5-9)	8 (5-9)	7 (5-9)	8 (5-9)
Lost to follow up after one year (Column %)	13.7	15.5	13.1	14.2	13.2	12.6	13.8	12.1	12.6	11.8
